# Supplementary material for: The biogenic synthesis of a reduced graphene oxide–silver (RGO–Ag) nanocomposite and its dual applications as an antibacterial agent and cancer biomarker sensor
Source: Royal Society of Chemistry journal article supplement (doi:10.1039/c6ra02928k), 2016-01-01
Supplement: c6ra02928k1.pdf [file c6ra02928k1.pdf]

**Electronic Supplementary Information-Manuscript Id: RA-ART-02-2016-002928**  
**“Biogenic Synthesis of Reduced Graphene Oxide-Silver (RGO-Ag) Nanocomposite and its Dual Applications as Antibacterial Agent and Cancer Biomarker Sensor”**

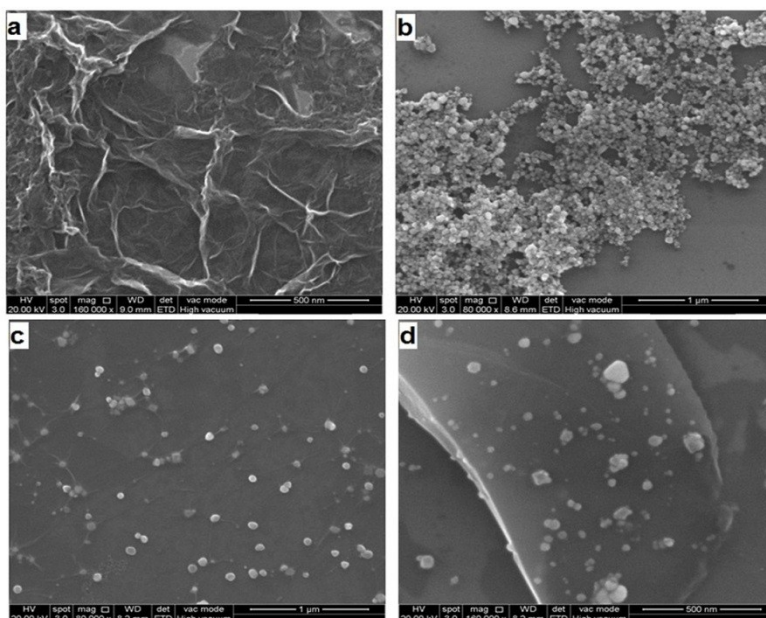

**Fig. S1** SEM images of the synthesized (a) RGO (b) AgNPs (c) air-dried RGO-Ag nanocomposite (12 h) and (d) RGO-Ag nanocomposite (24 h).

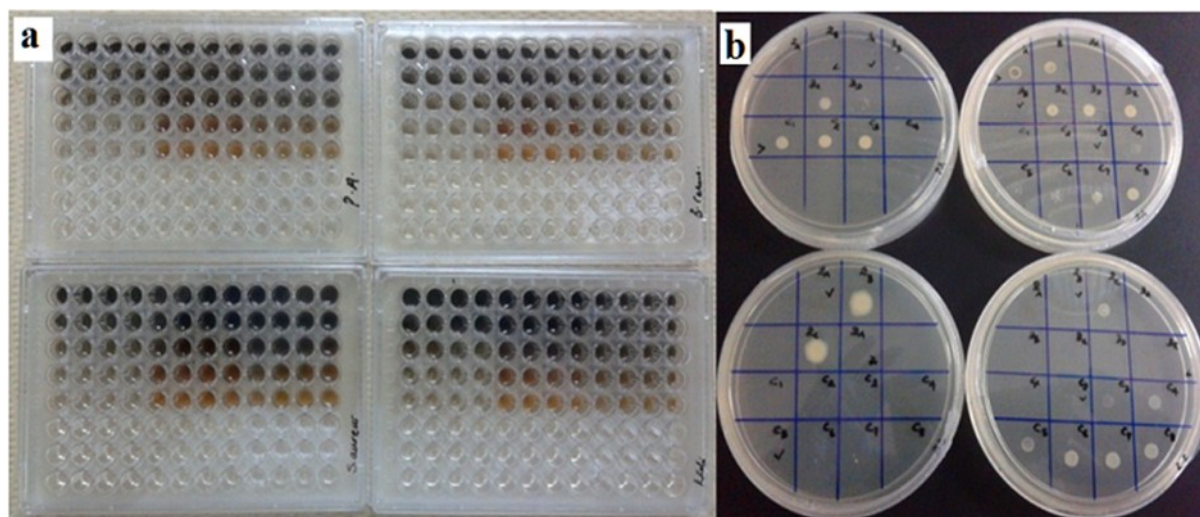

**Fig. S2** (a) Broth dilution test to determine the MIC value of RGO, AgNPs, RGO-Ag and chloramphenicol (5 different concentrations) against 4 different bacteria, (b) MBC value calculation of RGO, AgNPs, RGO-Ag and chloramphenicol on 4 different bacteria

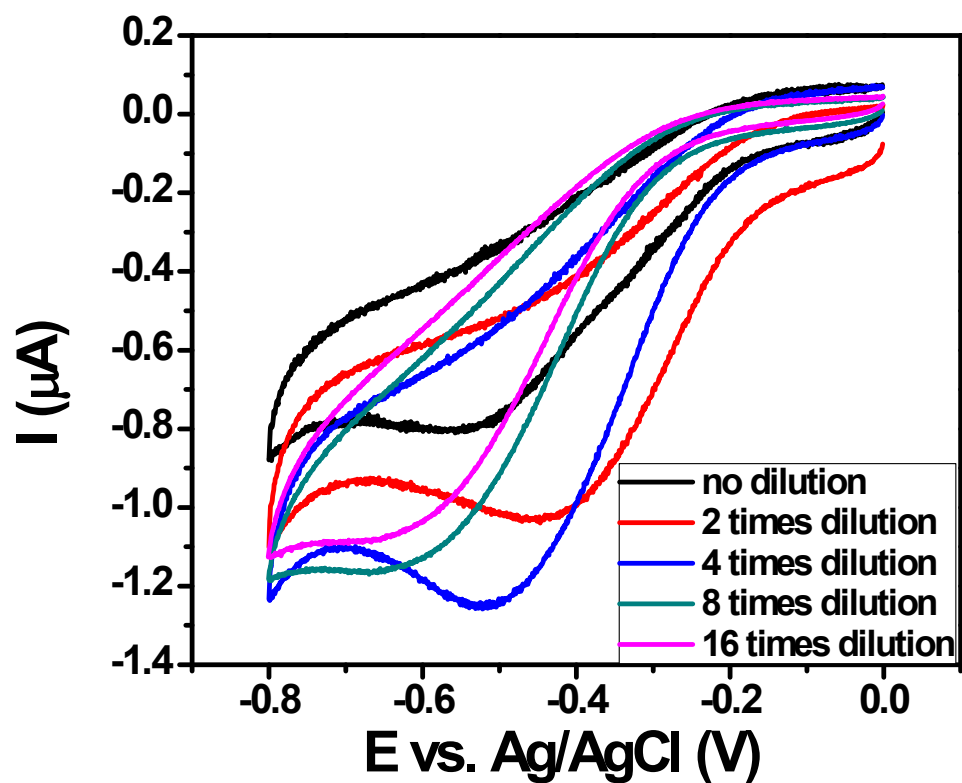

**Fig. S3** Cyclic voltammograms recorded at different concentrations of RGO-Ag modified GC electrodes in 0.1 M PBS (pH 7.2) and 0.1 mM  $\text{H}_2\text{O}_2$  with a scan rate of  $50 \text{ mV s}^{-1}$ .

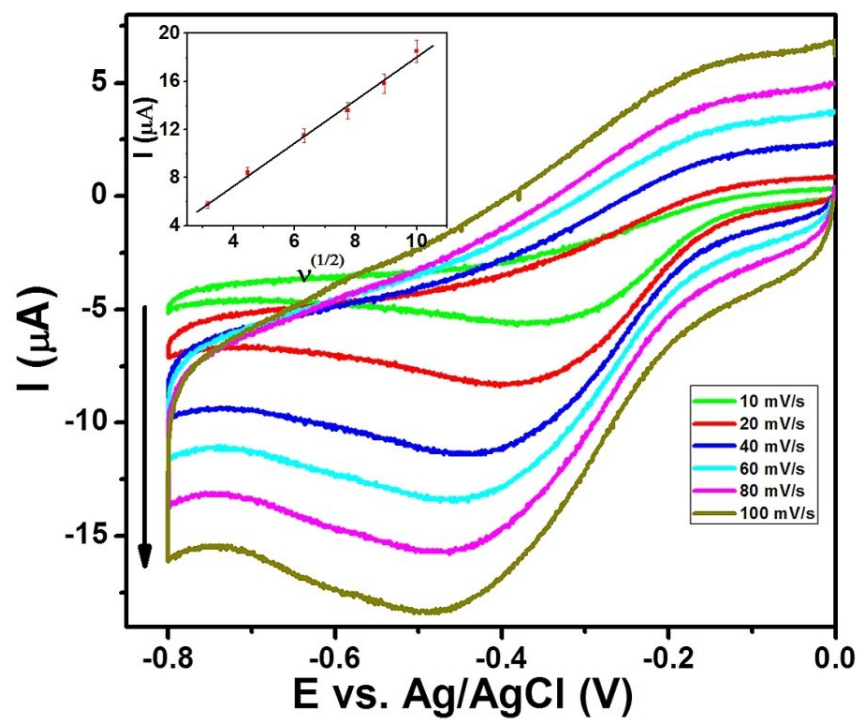

**Fig. S4** Cyclic voltammograms recorded for GC/RGO-Ag nanocomposite modified electrode in the presence of 10  $\mu\text{M}$   $\text{H}_2\text{O}_2$  in 0.1 M PBS (pH 7.2) at different scan rates (10-100  $\text{mV s}^{-1}$ ).
